# Supplementary material for: Parallel evolution leading to impaired biofilm formation in invasive Salmonella strains
Source: PubMed Central journal article supplement (PMC6611641; doi:10.1371/journal.pgen.1008233), 2019-06-24
Supplement: pgen.1008233.s009.pdf [file pgen.1008233.s009.pdf]

**Table S1.** Strains and plasmids used in this study.

| Strain or Plasmid                     | Genotype                                     | Source or Reference     |
|---------------------------------------|----------------------------------------------|-------------------------|
| Strains                               |                                              |                         |
| <i>S. Typhimurium</i> SL1344          | Wild-type strain                             | ATCC (W Köster, U of S) |
| <i>S. Enteritidis</i> ATCC 4931       | Wild-type strain                             | ATCC (D Korber, U of S) |
| <i>S. Enteritidis</i> 301 (Sal18)     | Wild-type strain                             | W Köster [1]            |
| <i>S. Typhi</i> E02-2759              | Wild-type strain                             | G. Dougan [2]           |
| <i>S. Typhi</i> E03-9804              | Wild-type strain                             | G. Dougan [2]           |
| <i>S. Typhi</i> ISP03-07467           | Wild-type strain                             | G. Dougan [2]           |
| <i>S. Typhi</i> ISP04-06979           | Wild-type strain                             | G. Dougan [2]           |
| <i>S. Typhi</i> 8(04)N                | Wild-type strain                             | G. Dougan [2]           |
| <i>S. Typhi</i> CT18                  | Wild-type strain                             | G. Dougan [3]           |
| <i>S. Enteritidis</i> D7795           | Wild-type strain                             | G. Dougan [4]           |
| -47 T>C                               | <i>PcsgD</i> from 14028                      | This study              |
| -47 T>T                               | Native <i>PcsgD</i> <sup>a</sup>             | This study              |
| <i>S. Typhimurium</i> D23580          | Wild-type strain                             | G. Dougan [5]           |
| -80 A>C                               | <i>PcsgD</i> SNP from 14028                  | This study              |
| -80 A>C, -189 A>G                     | <i>PcsgD</i> SNPs from 14028                 | This study              |
| <i>S. Typhimurium</i> 14028           | Wild-type strain                             | ATCC                    |
| -47 C>T                               | <i>PcsgD</i> from D7795                      | This study              |
| -47 C>C                               | Native <i>PcsgD</i> <sup>a</sup>             | This study              |
| <i>bcsG</i> <sub>(D23580)</sub>       | <i>bcsG</i> from D23580                      | This study              |
| <i>bcsG</i> <sub>(14028)</sub>        | Native <i>bcsG</i> <sup>a</sup>              | This study              |
| <i>csgD</i> <sub>(CT18)</sub>         | <i>csgD</i> from CT18                        | This study              |
| <i>csgD</i> <sub>(14028)</sub>        | Native <i>csgD</i> <sup>a</sup>              | This study              |
| Plasmids                              |                                              |                         |
| pCS26, pU220                          | Bacterial luciferase                         | [6]                     |
| pCS26- <i>csgB</i>                    | <i>csgBAC</i> promoter                       | [7]                     |
| pU220- <i>csgD</i>                    | <i>csgDEFG</i> promoter                      | [7]                     |
| pCS26-sig38H4                         | Synthetic, RpoS-responsive promoter          | [7]                     |
| pCS26- <i>adrA</i>                    | <i>adrA</i> promoter                         | [7]                     |
| pCS26- <i>cpxR</i>                    | <i>cpxR</i> promoter                         | This study              |
| pFLAG-CTC                             |                                              | Sigma-Aldrich           |
| p3xFLAG                               | Modified to have 3xFLAG at C-terminus        | This study              |
| p3xFLAG/ <i>csgD</i> <sup>CT18</sup>  | <i>csgD</i> from <i>S. Typhi</i> CT18        | This study              |
| p3xFLAG/ <i>csgD</i> <sup>14028</sup> | <i>csgD</i> from <i>S. Typhimurium</i> 14028 | This study              |

<sup>a</sup> These strains were selected at the end of the genome engineering procedure, and possessed promoter sequences or alleles that were the same as the parent strain

## SUPPLEMENTARY REFERENCES

1. Poppe C. *Salmonella* infections in the domestic fowl. *Salmonella* in domestic animals. Wallingford: CABI; 2000. pp. 107–132.  
doi:10.1079/9780851992617.0107
2. Holt KE, Parkhill J, Mazzoni CJ, Roumagnac P, Weill F-X, Goodhead I, et al. High-throughput sequencing provides insights into genome variation and evolution in *Salmonella* Typhi. *Nature Genetics*. 2008;40: 987–993.  
doi:10.1038/ng.195
3. Parkhill J, Dougan G, James KD, Thomson NR. Complete genome sequence of a multiple drug resistant *Salmonella enterica* serovar Typhi CT18. *Nature*. 2001;413: 848–852. doi:0.1038/35101607
4. Feasey NA, Hadfield J, Keddy KH, Dallman TJ, Jacobs J, Deng X, et al. Distinct *Salmonella* Enteritidis lineages associated with enterocolitis in high-income settings and invasive disease in low-income settings. *Nature Genetics*. 2016;48: 1211–1217. doi:10.1038/ng.3644
5. Kingsley RA, Msefula CL, Thomson NR, Kariuki S, Holt KE, Gordon MA, et al. Epidemic multiple drug resistant *Salmonella* Typhimurium causing invasive disease in sub-Saharan Africa have a distinct genotype. *Genome Res*. 2009;19: 2279–2287. doi:10.1101/gr.091017.109
6. Bjarnason J, Southward CM, Surette MG. Genomic profiling of iron-responsive genes in *Salmonella enterica* serovar typhimurium by high-throughput screening of a random promoter library. *Journal of Bacteriology*. American Society for Microbiology (ASM); 2003;185: 4973–4982. doi:10.1128/JB.185.16.4973-4982.2003
7. White AP, Gibson DL, Kim W, Kay WW, Surette MG. Thin Aggregative Fimbriae and Cellulose Enhance Long-Term Survival and Persistence of *Salmonella*. *Journal of Bacteriology*. 2006;188: 3219–3227.  
doi:10.1128/JB.188.9.3219-3227.2006
