# Supplementary material for: Parallel evolution leading to impaired biofilm formation in invasive Salmonella strains
Source: PubMed Central journal article supplement (PMC6611641; doi:10.1371/journal.pgen.1008233), 2019-06-24
Supplement: pgen.1008233.s010.pdf [file pgen.1008233.s010.pdf]

**S2 Table.** Oligonucleotides used in this study.

| <b>Primer</b>    | <b>Sequence (5' - 3')<sup>a</sup></b>                                | <b>Purpose</b>                                                                                                            |
|------------------|----------------------------------------------------------------------|---------------------------------------------------------------------------------------------------------------------------|
| cpxR1            | <u>GCCCTCGAGG</u> TAACTTTGCGCATC<br>GCTTG                            | To amplify the <i>cpxRA</i> promoter region from <i>Salmonella</i> genomic DNA                                            |
| cpxR2            | GCC <u>GGATCCTT</u> CATTGTTTACGTA<br>CCTCCG                          |                                                                                                                           |
| agfD1            | <u>GTGCTCGAGG</u> ACTTCATTAACA<br>TGATG                              | To amplify the <i>csg</i> intergenic region for cloning into luciferase reporter plasmids                                 |
| agfD2            | GCC <u>GGATCCT</u> GTTTTTTCATGCTGT<br>CAC                            |                                                                                                                           |
| agfD3-FWD        | <u>GTACCTGCAGG</u> ACTTCATTAAC<br>ATGATG                             | To amplify the <i>csg</i> intergenic region from <i>Salmonella</i> genomic DNA for genome engineering                     |
| agfD4-REV        | GTC <u>AGGATCCT</u> GTTTTTTCATGCTG<br>TCAC                           |                                                                                                                           |
| agfD5-FWD        | <u>GTACCTGCAGT</u> GGTTAACAATCCG<br>GG                               | To amplify the <i>csg</i> intergenic region and <i>csgD</i> ORF from <i>Salmonella</i> genomic DNA for genome engineering |
| agfD6-REV        | GTC <u>AGGATCC</u> GGGGCGAATAGCC<br>ATA                              |                                                                                                                           |
| bcsG checkF      | <u>GATCGGATCC</u> GGATTTCTCCAGTT<br>CGGTAA                           | To amplify <i>bcsG</i> from <i>S. Typhimurium</i> D23580 for DNA sequencing and genome engineering                        |
| bcsG checkR      | GAT <u>CCTGCAGT</u> GGTATGGCTGAAT<br>GACTG                           |                                                                                                                           |
| 3xFLAG-linker A  | TCGAGAATGTAGCAGATCTGGAC<br>TACAAAGACCATGACGGTGATT<br>ATAAAGATCATGACA | To construct the p3xFLAG vector from pFLAG-CTC                                                                            |
| 3xFLAG-linker B  | TCGATGTCATGATCTTTATAATCA<br>CCGTCATGGTCTTTGTAGTCCAG<br>ATCTGCTACATTC |                                                                                                                           |
| csgD-ORF-start   | <u>GATCCTCGAGG</u> TCCATAGTAGTCA<br>TGGTCA                           | To amplify the <i>csgD</i> <sup>14028</sup> and <i>csgD</i> <sup>CT18</sup> -alleles for cloning into p3xFLAG             |
| csgD-ORF-end     | GATCGGAT <u>CCCGCCT</u> GAGATTATC<br>GTTTGC                          |                                                                                                                           |
| csgDORFstartPstI | GAT <u>CCTGCAGG</u> TCCATAGTAGTCA<br>TGGTCA                          | To amplify the <i>csgD</i> -containing DNA region from <i>S. Typhi</i> CT18 for genome engineering                        |
| csgDreplaceREV   | GATCGGAT <u>CCCGAAGAC</u> GACGGT<br>TTTCTC                           |                                                                                                                           |

<sup>a</sup> Nucleotide sequences corresponding to restriction enzyme sites are underlined.
